# Supplementary material for: The Staff Observation Aggression Scale – Revised (SOAS-R) – adjustment and validation for emergency primary health care
Source: Springer Nature journal article supplement (doi:10.1186/s12913-018-3157-z), 2018-05-08

# SOAS-RE

The Staff Observation Aggression Scale – Revised – Emergency primary care

The form is to be completed by the staff member who has exposed to aggressive behavior defined as: any verbal, nonverbal or physical behavior that was threatening (to self, others, property), or physical behavior that did harm (to self, others, property).

1. When was the incident?  
Date (dd/mm 20yy) ..... / ..... 20 .....  
Time .....
2. Where was the incident?  
At the clinic   
Over the phone   
At home visit   
Other.....
3. **Staff member exposed to incident:**  
Age .....  
Occupation .....  
Sex: Female  Male
4. Were you alone in the situation?  
Yes  No
5. **Aggressor:**  
Who: Patient  Next-of-kin  Other .....  
Sex: Female  Male
6. Does the aggressor have a known mental illness?  
Yes  No  Unknown
7. Was the aggressor under influence of drugs or alcohol?  
Yes  No  Unknown

Mark at least one alternative in each of the six columns below

| Provocation of aggressive behaviour                                                                                                                                                                                                                                                                                                                                                                 | Means used by the aggressor                                                                                                                                                                                                                                                                                                                                                                                                                                                                                                                                                                        | Target of aggression                                                                                                                                                                                                                                                                                                                                                                       | Consequence(s) for victim(s)                                                                                                                                                                                                                                                                                                                                                                                                                                                 | Measure(s) to stop aggression                                                                                                                                                                                                                                                                                                                                                                                                                                                                                                    | Persons involved in measure(s) to stop aggression                                                                                                                                                                                                                                                                                            |
|-----------------------------------------------------------------------------------------------------------------------------------------------------------------------------------------------------------------------------------------------------------------------------------------------------------------------------------------------------------------------------------------------------|----------------------------------------------------------------------------------------------------------------------------------------------------------------------------------------------------------------------------------------------------------------------------------------------------------------------------------------------------------------------------------------------------------------------------------------------------------------------------------------------------------------------------------------------------------------------------------------------------|--------------------------------------------------------------------------------------------------------------------------------------------------------------------------------------------------------------------------------------------------------------------------------------------------------------------------------------------------------------------------------------------|------------------------------------------------------------------------------------------------------------------------------------------------------------------------------------------------------------------------------------------------------------------------------------------------------------------------------------------------------------------------------------------------------------------------------------------------------------------------------|----------------------------------------------------------------------------------------------------------------------------------------------------------------------------------------------------------------------------------------------------------------------------------------------------------------------------------------------------------------------------------------------------------------------------------------------------------------------------------------------------------------------------------|----------------------------------------------------------------------------------------------------------------------------------------------------------------------------------------------------------------------------------------------------------------------------------------------------------------------------------------------|
| No understandable provocation <input type="checkbox"/><br><br><b>Provoked by:</b><br>Person had to wait <input type="checkbox"/><br>The person was denied something <input type="checkbox"/><br>The person disagreed about assessment/ advice <input type="checkbox"/><br>Involuntary assessment of health condition <input type="checkbox"/><br>Other, describe: <input type="checkbox"/><br>..... | Verbal aggression <input type="checkbox"/><br>Threat <input type="checkbox"/><br><br><b>Ordinary objects</b><br>Room contents/ objects <input type="checkbox"/><br><br><b>Parts of the body</b><br>Hand <input type="checkbox"/><br>Foot <input type="checkbox"/><br>Other, describe: <input type="checkbox"/><br>.....<br><br><b>Dangerous objects or methods</b><br>Attempt of strangulation <input type="checkbox"/><br>Used/had weapon <input type="checkbox"/><br>Used/had pointed weapon <input type="checkbox"/><br>Other dangerous objects incl. syringe <input type="checkbox"/><br>..... | None <input type="checkbox"/><br>Furniture/objects <input type="checkbox"/><br>Physician <input type="checkbox"/><br>Nurse <input type="checkbox"/><br>Ambulance personnel <input type="checkbox"/><br>Security guard <input type="checkbox"/><br>Police <input type="checkbox"/><br>Other patients <input type="checkbox"/><br>Other persons, describe: <input type="checkbox"/><br>..... | None <input type="checkbox"/><br><br><b>Objects</b><br>Damaged <input type="checkbox"/><br><br><b>Person</b><br>Psychological/ emotional stress <input type="checkbox"/><br>Felt threatened <input type="checkbox"/><br>Pain <input type="checkbox"/><br>Visible injury <input type="checkbox"/><br>Need for treatment by a physician <input type="checkbox"/><br>Needed to be taken off duty <input type="checkbox"/><br>Other, describe: <input type="checkbox"/><br>..... | None <input type="checkbox"/><br>Talked to person <input type="checkbox"/><br>Took the person aside <input type="checkbox"/><br>Withdrew from situation/ ended call <input type="checkbox"/><br>Complied with the person's wish <input type="checkbox"/><br>Asked the person to leave the site <input type="checkbox"/><br>Forced the person to leave <input type="checkbox"/><br>Held the person by force <input type="checkbox"/><br>Medication <input type="checkbox"/><br>Other, describe: <input type="checkbox"/><br>..... | Physician <input type="checkbox"/><br>Nurse <input type="checkbox"/><br>Ambulance personnel <input type="checkbox"/><br>Security guard <input type="checkbox"/><br>Police <input type="checkbox"/><br>Other patients <input type="checkbox"/><br>Next-of-kin <input type="checkbox"/><br>Others, describe: <input type="checkbox"/><br>..... |

Adjusted from "The Staff Observation Aggression Scale-Revised (SOAS-R)" (Nijman et al. 1999)

## Visual Analogue Scale (VAS)

Mark on the line  
The aggressive incident was

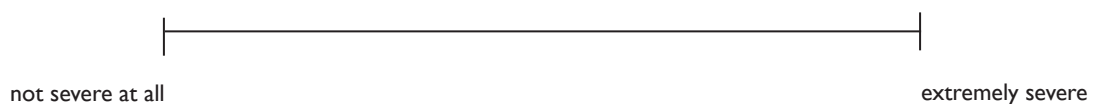

Supplement: MOESM1 [file 15746380]
